# Supplementary material
Source: PubMed Central journal article supplement (PMC8889053)
Supplement: 11910_2022_1179_MOESM2_ESM.pdf [file 11910_2022_1179_MOESM2_ESM.pdf]

## ICMJE DISCLOSURE FORM

**Date:** 12/8/2021

**Your Name:** Neal S. Parikh

**Manuscript Title:** Recent Advances in the Impact of Infection and Inflammation on Stroke Risk and Outcomes

**Manuscript Number (if known):** Unknown

In the interest of transparency, we ask you to disclose all relationships/activities/interests listed below that are related to the content of your manuscript. "Related" means any relation with for-profit or not-for-profit third parties whose interests may be affected by the content of the manuscript. Disclosure represents a commitment to transparency and does not necessarily indicate a bias. If you are in doubt about whether to list a relationship/activity/interest, it is preferable that you do so.

The author's relationships/activities/interests should be defined broadly. For example, if your manuscript pertains to the epidemiology of hypertension, you should declare all relationships with manufacturers of antihypertensive medication, even if that medication is not mentioned in the manuscript.

In item #1 below, report all support for the work reported in this manuscript without time limit. For all other items, the time frame for disclosure is the past 36 months.

|                                                           |                                                                                                                                                                                | Name all entities with whom you have this relationship or indicate none (add rows as needed) | Specifications/Comments (e.g., if payments were made to you or to your institution)                                                                                                                                                                                                                                                                          |                                                        |                                              |                                   |                      |                                                  |                      |
|-----------------------------------------------------------|--------------------------------------------------------------------------------------------------------------------------------------------------------------------------------|----------------------------------------------------------------------------------------------|--------------------------------------------------------------------------------------------------------------------------------------------------------------------------------------------------------------------------------------------------------------------------------------------------------------------------------------------------------------|--------------------------------------------------------|----------------------------------------------|-----------------------------------|----------------------|--------------------------------------------------|----------------------|
| <b>Time frame: Since the initial planning of the work</b> |                                                                                                                                                                                |                                                                                              |                                                                                                                                                                                                                                                                                                                                                              |                                                        |                                              |                                   |                      |                                                  |                      |
| <b>1</b>                                                  | All support for the present manuscript (e.g., funding, provision of study materials, medical writing, article processing charges, etc.)<br><b>No time limit for this item.</b> | <input type="checkbox"/> <b>None</b>                                                         | <table border="1" style="width: 100%; border-collapse: collapse;"> <tr> <td style="width: 60%;">NIH/NIA K23AG073524</td> <td>Paid to institution.</td> </tr> <tr> <td>Leon Levy Neuroscience Fellowship</td> <td>Paid to institution.</td> </tr> <tr> <td>Florence Gould Endowment for Discovery in Stroke</td> <td>Paid to institution.</td> </tr> </table> | NIH/NIA K23AG073524                                    | Paid to institution.                         | Leon Levy Neuroscience Fellowship | Paid to institution. | Florence Gould Endowment for Discovery in Stroke | Paid to institution. |
| NIH/NIA K23AG073524                                       | Paid to institution.                                                                                                                                                           |                                                                                              |                                                                                                                                                                                                                                                                                                                                                              |                                                        |                                              |                                   |                      |                                                  |                      |
| Leon Levy Neuroscience Fellowship                         | Paid to institution.                                                                                                                                                           |                                                                                              |                                                                                                                                                                                                                                                                                                                                                              |                                                        |                                              |                                   |                      |                                                  |                      |
| Florence Gould Endowment for Discovery in Stroke          | Paid to institution.                                                                                                                                                           |                                                                                              |                                                                                                                                                                                                                                                                                                                                                              |                                                        |                                              |                                   |                      |                                                  |                      |
| <b>Time frame: past 36 months</b>                         |                                                                                                                                                                                |                                                                                              |                                                                                                                                                                                                                                                                                                                                                              |                                                        |                                              |                                   |                      |                                                  |                      |
| <b>2</b>                                                  | Grants or contracts from any entity (if not indicated in item #1 above).                                                                                                       | <input type="checkbox"/> <b>None</b>                                                         | <table border="1" style="width: 100%; border-collapse: collapse;"> <tr> <td style="width: 60%;">NY State Empire Clinical Research Investigator Program</td> <td>Paid to institution, unrelated to this work.</td> </tr> <tr> <td> </td> <td> </td> </tr> <tr> <td> </td> <td> </td> </tr> </table>                                                           | NY State Empire Clinical Research Investigator Program | Paid to institution, unrelated to this work. |                                   |                      |                                                  |                      |
| NY State Empire Clinical Research Investigator Program    | Paid to institution, unrelated to this work.                                                                                                                                   |                                                                                              |                                                                                                                                                                                                                                                                                                                                                              |                                                        |                                              |                                   |                      |                                                  |                      |
|                                                           |                                                                                                                                                                                |                                                                                              |                                                                                                                                                                                                                                                                                                                                                              |                                                        |                                              |                                   |                      |                                                  |                      |
|                                                           |                                                                                                                                                                                |                                                                                              |                                                                                                                                                                                                                                                                                                                                                              |                                                        |                                              |                                   |                      |                                                  |                      |
| <b>3</b>                                                  | Royalties or licenses                                                                                                                                                          | <input checked="" type="checkbox"/> <b>None</b>                                              | <table border="1" style="width: 100%; border-collapse: collapse;"> <tr> <td style="width: 60%;"> </td> <td> </td> </tr> <tr> <td> </td> <td> </td> </tr> <tr> <td> </td> <td> </td> </tr> </table>                                                                                                                                                           |                                                        |                                              |                                   |                      |                                                  |                      |
|                                                           |                                                                                                                                                                                |                                                                                              |                                                                                                                                                                                                                                                                                                                                                              |                                                        |                                              |                                   |                      |                                                  |                      |
|                                                           |                                                                                                                                                                                |                                                                                              |                                                                                                                                                                                                                                                                                                                                                              |                                                        |                                              |                                   |                      |                                                  |                      |
|                                                           |                                                                                                                                                                                |                                                                                              |                                                                                                                                                                                                                                                                                                                                                              |                                                        |                                              |                                   |                      |                                                  |                      |

|                                                                                               |                                                                                                              | Name all entities with whom you have this relationship or indicate none (add rows as needed)                                                                                                                                                                                                                                                                                                                                                               | Specifications/Comments (e.g., if payments were made to you or to your institution)           |                                     |  |  |  |  |  |  |  |
|-----------------------------------------------------------------------------------------------|--------------------------------------------------------------------------------------------------------------|------------------------------------------------------------------------------------------------------------------------------------------------------------------------------------------------------------------------------------------------------------------------------------------------------------------------------------------------------------------------------------------------------------------------------------------------------------|-----------------------------------------------------------------------------------------------|-------------------------------------|--|--|--|--|--|--|--|
| 4                                                                                             | Consulting fees                                                                                              | <input checked="" type="checkbox"/> <b>None</b><br><table border="1" style="width: 100%; border-collapse: collapse;"> <tr><td style="width: 50%; height: 20px;"></td><td style="width: 50%;"></td></tr> <tr><td style="height: 20px;"></td><td></td></tr> <tr><td style="height: 20px;"></td><td></td></tr> <tr><td style="height: 20px;"></td><td></td></tr> </table>                                                                                     |                                                                                               |                                     |  |  |  |  |  |  |  |
|                                                                                               |                                                                                                              |                                                                                                                                                                                                                                                                                                                                                                                                                                                            |                                                                                               |                                     |  |  |  |  |  |  |  |
|                                                                                               |                                                                                                              |                                                                                                                                                                                                                                                                                                                                                                                                                                                            |                                                                                               |                                     |  |  |  |  |  |  |  |
|                                                                                               |                                                                                                              |                                                                                                                                                                                                                                                                                                                                                                                                                                                            |                                                                                               |                                     |  |  |  |  |  |  |  |
|                                                                                               |                                                                                                              |                                                                                                                                                                                                                                                                                                                                                                                                                                                            |                                                                                               |                                     |  |  |  |  |  |  |  |
| 5                                                                                             | Payment or honoraria for lectures, presentations, speakers bureaus, manuscript writing or educational events | <input checked="" type="checkbox"/> <b>None</b><br><table border="1" style="width: 100%; border-collapse: collapse;"> <tr><td style="width: 50%; height: 20px;"></td><td style="width: 50%;"></td></tr> <tr><td style="height: 20px;"></td><td></td></tr> <tr><td style="height: 20px;"></td><td></td></tr> </table>                                                                                                                                       |                                                                                               |                                     |  |  |  |  |  |  |  |
|                                                                                               |                                                                                                              |                                                                                                                                                                                                                                                                                                                                                                                                                                                            |                                                                                               |                                     |  |  |  |  |  |  |  |
|                                                                                               |                                                                                                              |                                                                                                                                                                                                                                                                                                                                                                                                                                                            |                                                                                               |                                     |  |  |  |  |  |  |  |
|                                                                                               |                                                                                                              |                                                                                                                                                                                                                                                                                                                                                                                                                                                            |                                                                                               |                                     |  |  |  |  |  |  |  |
| 6                                                                                             | Payment for expert testimony                                                                                 | <input type="checkbox"/> <b>None</b><br><table border="1" style="width: 100%; border-collapse: collapse;"> <tr> <td style="width: 50%; padding: 5px;">I have received personal fees for medicolegal consulting, entailing expert witness testimony.</td> <td style="width: 50%; padding: 5px;">Paid to me, unrelated to this work.</td> </tr> <tr><td style="height: 20px;"></td><td></td></tr> <tr><td style="height: 20px;"></td><td></td></tr> </table> | I have received personal fees for medicolegal consulting, entailing expert witness testimony. | Paid to me, unrelated to this work. |  |  |  |  |  |  |  |
| I have received personal fees for medicolegal consulting, entailing expert witness testimony. | Paid to me, unrelated to this work.                                                                          |                                                                                                                                                                                                                                                                                                                                                                                                                                                            |                                                                                               |                                     |  |  |  |  |  |  |  |
|                                                                                               |                                                                                                              |                                                                                                                                                                                                                                                                                                                                                                                                                                                            |                                                                                               |                                     |  |  |  |  |  |  |  |
|                                                                                               |                                                                                                              |                                                                                                                                                                                                                                                                                                                                                                                                                                                            |                                                                                               |                                     |  |  |  |  |  |  |  |
| 7                                                                                             | Support for attending meetings and/or travel                                                                 | <input checked="" type="checkbox"/> <b>None</b><br><table border="1" style="width: 100%; border-collapse: collapse;"> <tr><td style="width: 50%; height: 20px;"></td><td style="width: 50%;"></td></tr> <tr><td style="height: 20px;"></td><td></td></tr> <tr><td style="height: 20px;"></td><td></td></tr> </table>                                                                                                                                       |                                                                                               |                                     |  |  |  |  |  |  |  |
|                                                                                               |                                                                                                              |                                                                                                                                                                                                                                                                                                                                                                                                                                                            |                                                                                               |                                     |  |  |  |  |  |  |  |
|                                                                                               |                                                                                                              |                                                                                                                                                                                                                                                                                                                                                                                                                                                            |                                                                                               |                                     |  |  |  |  |  |  |  |
|                                                                                               |                                                                                                              |                                                                                                                                                                                                                                                                                                                                                                                                                                                            |                                                                                               |                                     |  |  |  |  |  |  |  |
| 8                                                                                             | Patents planned, issued or pending                                                                           | <input checked="" type="checkbox"/> <b>None</b><br><table border="1" style="width: 100%; border-collapse: collapse;"> <tr><td style="width: 50%; height: 20px;"></td><td style="width: 50%;"></td></tr> <tr><td style="height: 20px;"></td><td></td></tr> <tr><td style="height: 20px;"></td><td></td></tr> </table>                                                                                                                                       |                                                                                               |                                     |  |  |  |  |  |  |  |
|                                                                                               |                                                                                                              |                                                                                                                                                                                                                                                                                                                                                                                                                                                            |                                                                                               |                                     |  |  |  |  |  |  |  |
|                                                                                               |                                                                                                              |                                                                                                                                                                                                                                                                                                                                                                                                                                                            |                                                                                               |                                     |  |  |  |  |  |  |  |
|                                                                                               |                                                                                                              |                                                                                                                                                                                                                                                                                                                                                                                                                                                            |                                                                                               |                                     |  |  |  |  |  |  |  |
| 9                                                                                             | Participation on a Data Safety Monitoring Board or Advisory Board                                            | <input checked="" type="checkbox"/> <b>None</b><br><table border="1" style="width: 100%; border-collapse: collapse;"> <tr><td style="width: 50%; height: 20px;"></td><td style="width: 50%;"></td></tr> <tr><td style="height: 20px;"></td><td></td></tr> <tr><td style="height: 20px;"></td><td></td></tr> </table>                                                                                                                                       |                                                                                               |                                     |  |  |  |  |  |  |  |
|                                                                                               |                                                                                                              |                                                                                                                                                                                                                                                                                                                                                                                                                                                            |                                                                                               |                                     |  |  |  |  |  |  |  |
|                                                                                               |                                                                                                              |                                                                                                                                                                                                                                                                                                                                                                                                                                                            |                                                                                               |                                     |  |  |  |  |  |  |  |
|                                                                                               |                                                                                                              |                                                                                                                                                                                                                                                                                                                                                                                                                                                            |                                                                                               |                                     |  |  |  |  |  |  |  |
| 10                                                                                            | Leadership or fiduciary role in other board, society, committee or advocacy group, paid or unpaid            | <input checked="" type="checkbox"/> <b>None</b><br><table border="1" style="width: 100%; border-collapse: collapse;"> <tr><td style="width: 50%; height: 20px;"></td><td style="width: 50%;"></td></tr> <tr><td style="height: 20px;"></td><td></td></tr> <tr><td style="height: 20px;"></td><td></td></tr> </table>                                                                                                                                       |                                                                                               |                                     |  |  |  |  |  |  |  |
|                                                                                               |                                                                                                              |                                                                                                                                                                                                                                                                                                                                                                                                                                                            |                                                                                               |                                     |  |  |  |  |  |  |  |
|                                                                                               |                                                                                                              |                                                                                                                                                                                                                                                                                                                                                                                                                                                            |                                                                                               |                                     |  |  |  |  |  |  |  |
|                                                                                               |                                                                                                              |                                                                                                                                                                                                                                                                                                                                                                                                                                                            |                                                                                               |                                     |  |  |  |  |  |  |  |

|           |                                                                                  | Name all entities with whom you have this relationship or indicate none (add rows as needed)                                                                                                                                                                                                                         | Specifications/Comments (e.g., if payments were made to you or to your institution) |  |  |  |  |  |  |
|-----------|----------------------------------------------------------------------------------|----------------------------------------------------------------------------------------------------------------------------------------------------------------------------------------------------------------------------------------------------------------------------------------------------------------------|-------------------------------------------------------------------------------------|--|--|--|--|--|--|
| <b>11</b> | Stock or stock options                                                           | <input checked="" type="checkbox"/> <b>None</b><br><table border="1" style="width: 100%; border-collapse: collapse;"> <tr><td style="width: 50%; height: 20px;"></td><td style="width: 50%;"></td></tr> <tr><td style="height: 20px;"></td><td></td></tr> <tr><td style="height: 20px;"></td><td></td></tr> </table> |                                                                                     |  |  |  |  |  |  |
|           |                                                                                  |                                                                                                                                                                                                                                                                                                                      |                                                                                     |  |  |  |  |  |  |
|           |                                                                                  |                                                                                                                                                                                                                                                                                                                      |                                                                                     |  |  |  |  |  |  |
|           |                                                                                  |                                                                                                                                                                                                                                                                                                                      |                                                                                     |  |  |  |  |  |  |
| <b>12</b> | Receipt of equipment, materials, drugs, medical writing, gifts or other services | <input checked="" type="checkbox"/> <b>None</b><br><table border="1" style="width: 100%; border-collapse: collapse;"> <tr><td style="width: 50%; height: 20px;"></td><td style="width: 50%;"></td></tr> <tr><td style="height: 20px;"></td><td></td></tr> <tr><td style="height: 20px;"></td><td></td></tr> </table> |                                                                                     |  |  |  |  |  |  |
|           |                                                                                  |                                                                                                                                                                                                                                                                                                                      |                                                                                     |  |  |  |  |  |  |
|           |                                                                                  |                                                                                                                                                                                                                                                                                                                      |                                                                                     |  |  |  |  |  |  |
|           |                                                                                  |                                                                                                                                                                                                                                                                                                                      |                                                                                     |  |  |  |  |  |  |
| <b>13</b> | Other financial or non-financial interests                                       | <input checked="" type="checkbox"/> <b>None</b><br><table border="1" style="width: 100%; border-collapse: collapse;"> <tr><td style="width: 50%; height: 20px;"></td><td style="width: 50%;"></td></tr> <tr><td style="height: 20px;"></td><td></td></tr> <tr><td style="height: 20px;"></td><td></td></tr> </table> |                                                                                     |  |  |  |  |  |  |
|           |                                                                                  |                                                                                                                                                                                                                                                                                                                      |                                                                                     |  |  |  |  |  |  |
|           |                                                                                  |                                                                                                                                                                                                                                                                                                                      |                                                                                     |  |  |  |  |  |  |
|           |                                                                                  |                                                                                                                                                                                                                                                                                                                      |                                                                                     |  |  |  |  |  |  |

**Please place an "X" next to the following statement to indicate your agreement:**

I certify that I have answered every question and have not altered the wording of any of the questions on this form.
